# Supplementary material for: The evolutionary legacy of size-selective harvesting extends from genes to populations
Source: PubMed Central journal article supplement (PMC4479515; doi:10.1111/eva.12268), 2015-05-27

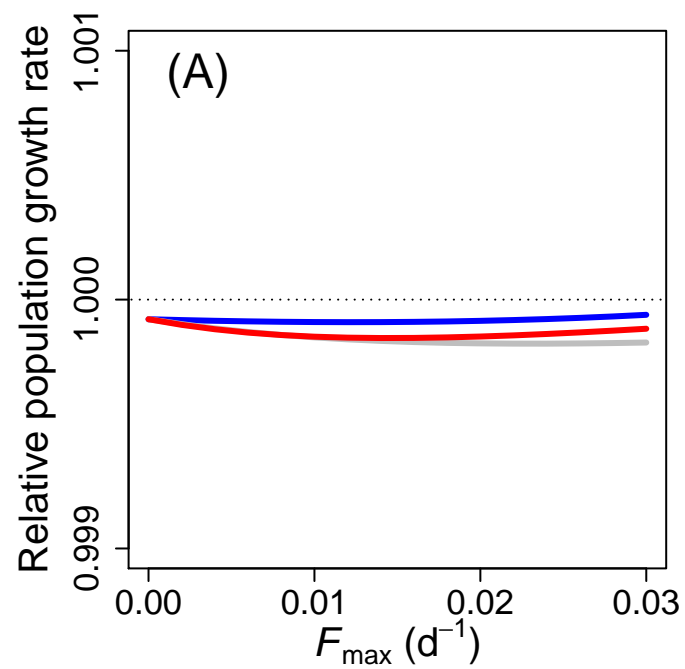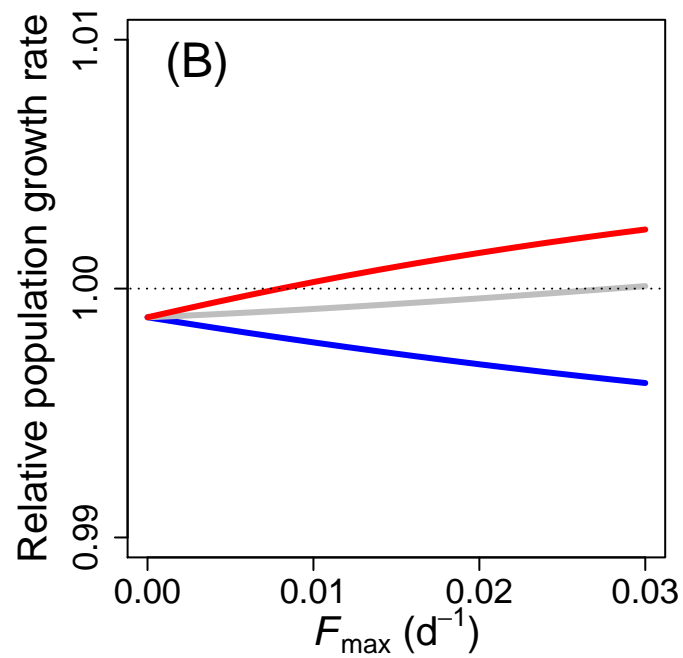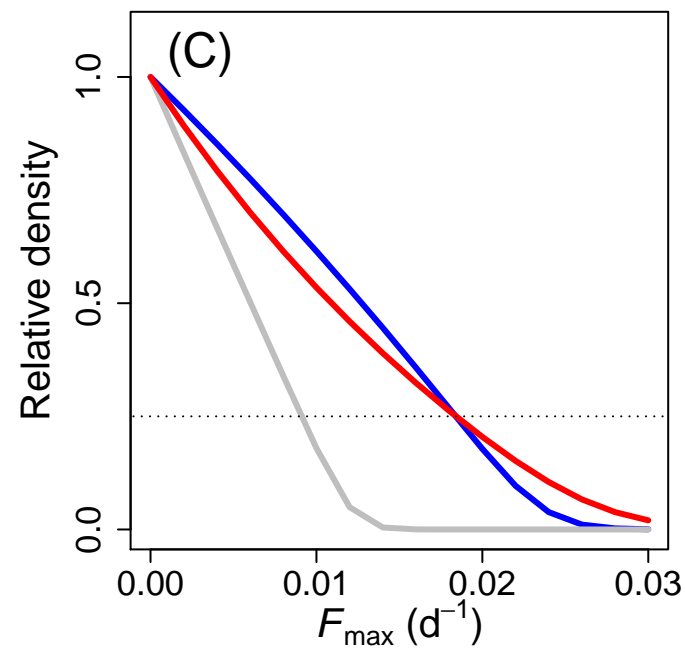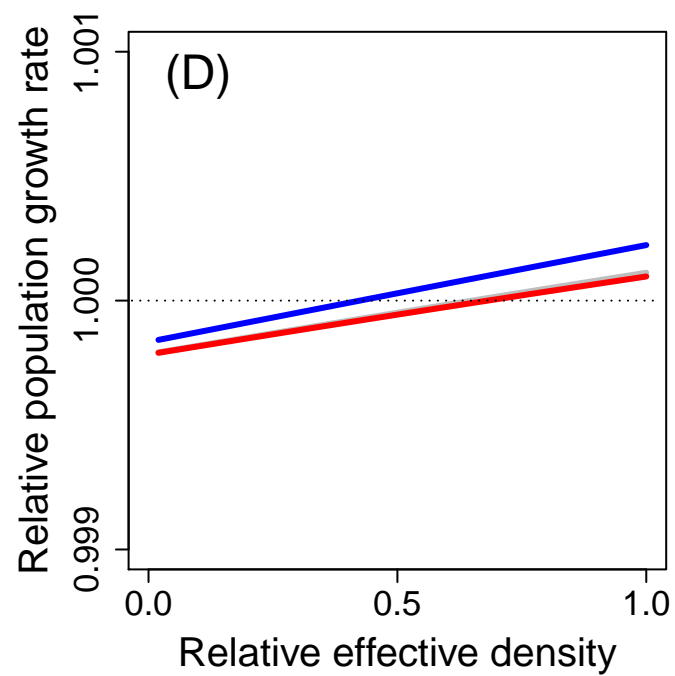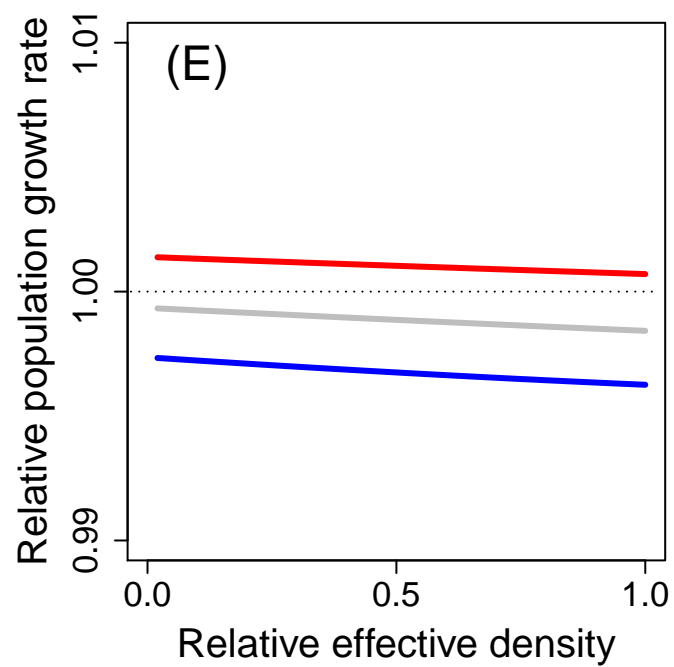

Supplement: eva0008-0597-sd4.pdf [file eva0008-0597-sd4.pdf]
